# Supplementary material for: Asialoglycoprotein receptor 1 is a novel PCSK9-independent ligand of liver LDLR cleaved by furin
Source: PubMed Central journal article supplement (PMC8479480; doi:10.1016/j.jbc.2021.101177), 2021-09-08
Supplement: mmc1.pdf [file mmc1.pdf]

**Supplementary Table S1. Antibodies used for Western blotting, immunofluorescent staining, immunohistochemical staining and immunoprecipitation**

| <b>Antibody</b>                              | <b>Catalog No; Source</b> | <b>Application</b> | <b>Dilution</b> |
|----------------------------------------------|---------------------------|--------------------|-----------------|
| <b>human LDLR</b>                            | AF2148; R&D               | WB                 | 1:1,000         |
| <b>mouse LDLR</b>                            | AF2255; R&D               | WB                 | 1:1,000         |
| <b>ASGR1</b>                                 | 11739-1-AP; Proteintech   | WB                 | 1:1,000         |
| <b><math>\alpha</math>-Tubulin</b>           | 11224-1-AP; Proteintech   | WB                 | 1:5,000         |
| <b><math>\mu</math>-Actin</b>                | A2066; Sigma              | WB                 | 1:5,000         |
| <b>Insulin receptor <math>\beta</math></b>   | ENZ-ABS710; Enzo          | WB                 | 1:1,000         |
| <b>CD36</b>                                  | Ab36977; Abcam            | WB                 | 1:1,000         |
| <b>human PCSK9</b>                           | (1)                       | WB                 | 1:3,000         |
| <b>Flag-HRP</b>                              | A8592; Sigma              | WB                 | 1:5,000         |
| <b>HA-HRP</b>                                | H6533; Sigma              | WB                 | 1:4,000         |
| <b>V5-HRP</b>                                | V2260; Sigma              | WB                 | 1:10,000        |
| <b>Rabbit TrueBlot®: Anti-Rabbit IgG HRP</b> | 18-8816-31; Rockland Inc. | WB                 | 1:2,000         |
| <b>human LDLR</b>                            | AF2148; R&D               | IF                 | 1:200           |
| <b>ASGR1</b>                                 | 11739-1-AP; Proteintech   | IF                 | 1:200           |
| <b>mouse LDLR</b>                            | AF2255; R&D               | IHC                | 1:150           |
| <b>ASGR1</b>                                 | 11739-1-AP; Proteintech   | IHC                | 1:300           |
| <b>Goat anti rabbit IgG Alexa Fluor 488</b>  | A27034; Invitrogen        | IHC/IF             | 1:150/1:500     |
| <b>Donkey anti goat IgG Alexa Fluor 488</b>  | A-11055; Invitrogen       | IHC/IF             | 1:150/1:500     |
| <b>Flag M2</b>                               | F1804; Sigma              | IP/IF              | n/a /1:250      |
| <b>V5</b>                                    | R960-25; Invitrogen       | IP                 | n/a             |
| <b>ASGR1</b>                                 | 11739-1-AP; Proteintech   | IP                 | n/a             |

WB, Western blot; IF, immunofluorescence; IHC, immunohistochemistry

1. Nassoury, N., Blasiolo, D. A., Tebon, O. A., Benjannet, S., Hamelin, J., Poupon, V., McPherson, P. S., Attie, A. D., Prat, A., and Seidah, N. G. (2007) The Cellular Trafficking of the Secretory Proprotein Convertase PCSK9 and Its Dependence on the LDLR. *Traffic*. **8**, 718-732

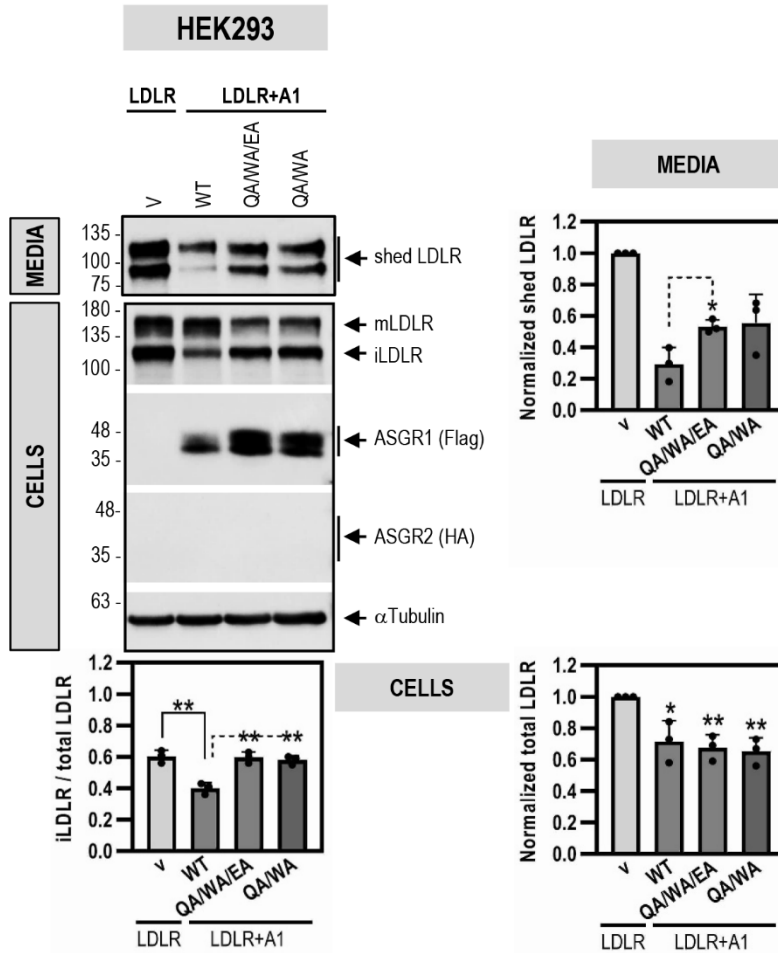

**Supplementary Figure S1: The ASGR1-mediated degradation of LDLR through its lectin-binding domain is independent of ASGR2 when co-expressed in HEK293 cells**

HEK293 cells were co-transfected with V5-tagged LDLR and either Flag-tagged ASGR1 (A1), WT or its carbohydrate-binding mutants Q240A/W244A/E253A (QA/WA/EA) or Q240A/W244A (QA/WA) or control empty vector (V). WB analyses of total cellular LDLR (mature mLDLR, and immature iLDLR) and ASGR1 (Flag-HRP) and of shed LDLR in the media are shown. The empty vector control (V) is the same as the one used for Figs. 7 and 9C. This is justified since the above control data are derived from the same experiment testing the effects on LDLR of ASGR2 alone (Fig. 7), and of ASGR1 in the presence (Figs. 7, 9C), or absence of ASGR2 (Fig. 7 and present Supplementary Figure S1). Quantifications are averages  $\pm$  SD of three independent experiments. \*  $p < 0.1$ ; \*\*  $p < 0.01$  (t-test) are relative to the control vector condition.
